# Supplementary material for: Randomised controlled trial of alternative messages to increase enrolment in a healthy food programme among individuals with diabetes
Source: PubMed Central journal article supplement — BMJ Open. 2016 Nov 30;6(11):e012009. doi: 10.1136/bmjopen-2016-012009 (PMC5168560; doi:10.1136/bmjopen-2016-012009), 2016-11-30
Supplement: bmjopen-2016-012009supp_appendix.pdf [file bmjopen-2016-012009supp_appendix.pdf]

| <b>Foods Eligible for HealthyFood Cash-Back Rewards</b> |                                                                                                                                                                                                                                                                      |
|---------------------------------------------------------|----------------------------------------------------------------------------------------------------------------------------------------------------------------------------------------------------------------------------------------------------------------------|
| <b>Food Group</b>                                       | <b>Description/Examples</b>                                                                                                                                                                                                                                          |
| Vegetables                                              | All fresh vegetables and herbs, canned tomatoes, and several types of dried or frozen vegetables                                                                                                                                                                     |
| Fruit                                                   | All fresh fruit, selected dehydrated and frozen fruit, and canned apples                                                                                                                                                                                             |
| Carbohydrates                                           | Breads (e.g., wheat, rye, seeded), crackers (e.g., rye, rice), cereals (e.g., bran, low glycemic index muesli) , other starchy foods (e.g., whole wheat couscous), porridge (oats), rice (brown, wild), whole grains (e.g., barley, quinoa) , and whole wheat pastas |
| Proteins                                                | Skinless chicken, eggs, fresh or frozen fish, fish canned in water, ostrich, other fresh raw seafood (e.g., shrimp, calamari), and uncooked, unflavored tofu                                                                                                         |
| Dairy                                                   | Fat-free milk, fat-free unsweetened yogurt, fat-free cottage cheese, and unsweetened soy milk                                                                                                                                                                        |
| Lentils and Legumes                                     | All dried legumes and select canned legumes                                                                                                                                                                                                                          |
| Oils, Nuts, Seeds, and Spreads                          | Selected oils (e.g., olive, sunflower, avocado), unsalted, unseasoned raw nuts and seeds, canola spread, selected nut butters, and selected cooking sprays                                                                                                           |
